# Supplementary material for: Changes in telomere length and senescence markers during human ovarian tissue cryopreservation
Source: PubMed Central journal article supplement (PMC7838193; doi:10.1038/s41598-021-81973-3), 2021-01-26
Supplement: 41598_2021_81973_MOESM1_ESM.pdf [file 41598_2021_81973_MOESM1_ESM.pdf]

# **Changes in telomere length and senescence markers during human ovarian tissue cryopreservation**

Running title: Ovarian cryopreservation and telomere length

Boram Kim<sup>†</sup>, Ki-Jin Ryu<sup>†</sup>, Sanghoon Lee<sup>\*</sup>, Tak Kim

Department of Obstetrics and Gynecology, Korea University College of Medicine, 73, Incheon-ro, Seongbuk-gu, Seoul 02841, Korea

<sup>†</sup>Boram Kim and Ki-Jin Ryu contributed equally to this work and are thus considered co-first authors.

<sup>\*</sup>Corresponding author: Sanghoon Lee, MD, PhD

Department of Obstetrics and Gynecology, Korea University College of Medicine, 73, Incheon-ro, Seongbuk-gu, Seoul 02841, Korea.

Tel: +82-2-920-5310; Fax: +82-2-921-5357; E-mail: [mdleesh@gmail.com](mailto:mdleesh@gmail.com)

## Supplementary Material

Supplementary Figure 1. Full-length pictures of the blots

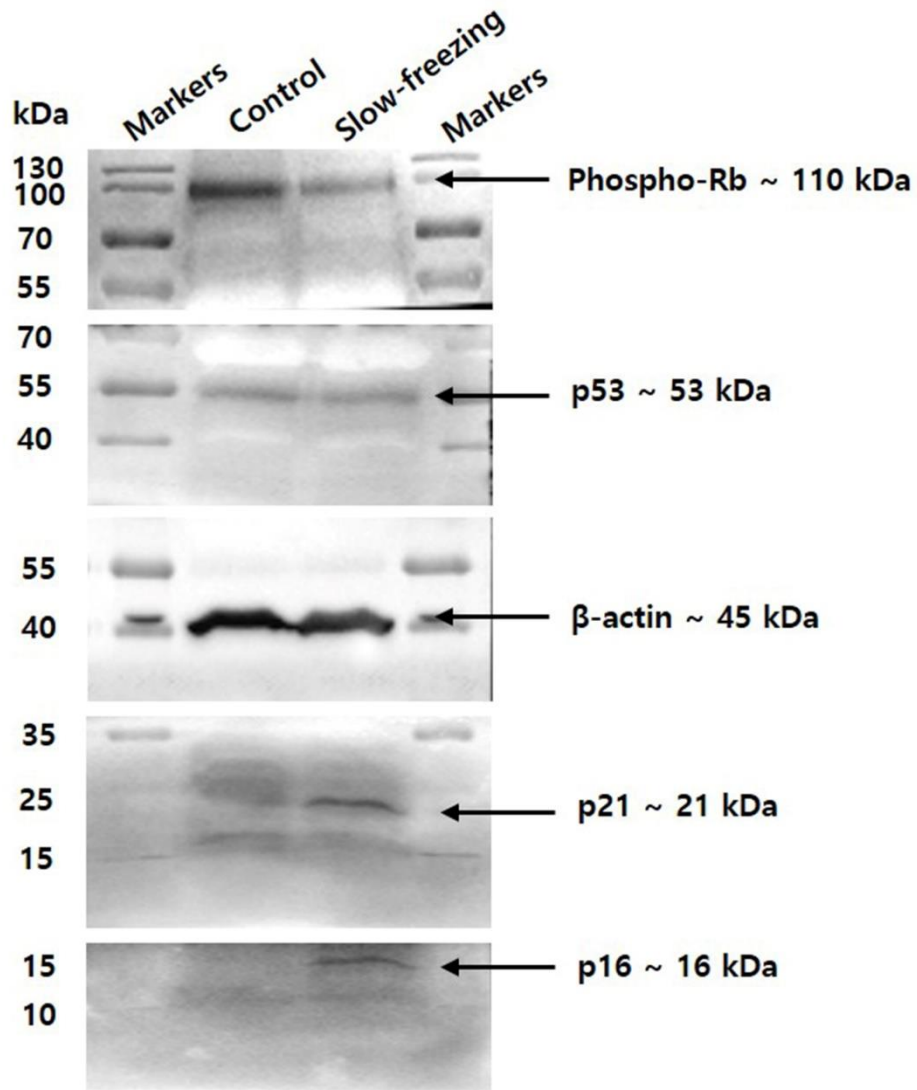

Full-length western blotting images of Figure 5A based on the four senescence protein markers, including phospho-pRb, p53, p16, and p21 in the same human ovarian tissue.
